# Supplementary material for: Multicomponent gas separation and purification using advanced 2D carbonaceous nanomaterials
Source: Royal Society of Chemistry journal article supplement (doi:10.1039/d0ra04286b), 2020-01-01
Supplement: d0ra04286b4.pdf [file d0ra04286b4.pdf]

Online Supporting Information for:

**Multicomponent Gas Separation and Purification Using Advanced 2D Carbonaceous  
Nanomaterials**

Sayyed Jalil Mahdizadeh<sup>1,2,\*</sup>, Elaheh K. Goharshadi<sup>2</sup>

<sup>1</sup> Department of Chemistry and Molecular Biology, University of Gothenburg, 405 30  
Göteborg, Sweden.

<sup>2</sup> Department of Chemistry, Ferdowsi University of Mashhad, Mashhad 9177948974, Iran.

\*corresponding author: Sayyed Jalil Mahdizadeh

Email: sayyed.jalil.mahdizadeh@gu.se

**Table S1.** The Morse potential parameters for interaction between various gas molecules and different membranes.

| <i>Gas</i>      | <i>Interaction</i> <sup>a</sup>   | <i>D<sub>0</sub></i> (eV) | <i>α</i> (Å <sup>-1</sup> ) | <i>r<sub>0</sub></i> (Å) |
|-----------------|-----------------------------------|---------------------------|-----------------------------|--------------------------|
| CH <sub>4</sub> | C <sub>CH4</sub> _C <sub>GD</sub> | 0.0065                    | 1.4652                      | 3.8863                   |
|                 | H <sub>CH4</sub> _C <sub>GD</sub> | 0.0060                    | 1.4013                      | 3.8359                   |
|                 | C <sub>CH4</sub> _C <sub>GN</sub> | 0.0064                    | 1.4051                      | 3.8896                   |
|                 | H <sub>CH4</sub> _C <sub>GN</sub> | 0.0012                    | 1.6033                      | 3.6265                   |
|                 | C <sub>CH4</sub> _C <sub>RG</sub> | 0.0011                    | 1.5342                      | 3.6500                   |
|                 | H <sub>CH4</sub> _C <sub>RG</sub> | 0.0013                    | 1.5772                      | 3.6400                   |
| CO <sub>2</sub> | C <sub>CO2</sub> _C <sub>GD</sub> | 0.0040                    | 1.3800                      | 3.7250                   |
|                 | O <sub>CO2</sub> _C <sub>GD</sub> | 0.0040                    | 1.5700                      | 3.7326                   |
|                 | C <sub>CO2</sub> _C <sub>GN</sub> | 0.0041                    | 1.3960                      | 3.7600                   |
|                 | O <sub>CO2</sub> _C <sub>GN</sub> | 0.0044                    | 1.5950                      | 3.7541                   |
|                 | C <sub>CO2</sub> _C <sub>RG</sub> | 0.0045                    | 1.4202                      | 3.7382                   |
|                 | O <sub>CO2</sub> _C <sub>RG</sub> | 0.0044                    | 1.7043                      | 3.7300                   |
| N <sub>2</sub>  | N <sub>N2</sub> _C <sub>GD</sub>  | 0.0047                    | 1.6050                      | 3.7695                   |
|                 | N <sub>N2</sub> _C <sub>GN</sub>  | 0.0046                    | 1.5050                      | 3.7430                   |
|                 | N <sub>N2</sub> _C <sub>RG</sub>  | 0.0043                    | 1.5700                      | 3.8200                   |
| O <sub>2</sub>  | O <sub>O2</sub> _C <sub>GD</sub>  | 0.0052                    | 1.5323                      | 3.6829                   |
|                 | O <sub>O2</sub> _C <sub>GN</sub>  | 0.0057                    | 1.4171                      | 3.6369                   |
|                 | O <sub>O2</sub> _C <sub>RG</sub>  | 0.0059                    | 1.5476                      | 3.6642                   |
| H <sub>2</sub>  | H <sub>H2</sub> _C <sub>GD</sub>  | 0.0031                    | 1.5635                      | 3.5471                   |
|                 | H <sub>H2</sub> _C <sub>GN</sub>  | 0.0022                    | 1.4700                      | 3.5111                   |
|                 | H <sub>H2</sub> _C <sub>RG</sub>  | 0.0035                    | 1.6500                      | 3.4800                   |

<sup>a</sup> A<sub>X</sub>\_C<sub>Y</sub> notation indicates the pairwise interaction between A atom(s) of the gas X and C atoms of the membrane Y.

## Optimized unit cell of different membranes

### 1- GD membrane

|   |              |             |             |
|---|--------------|-------------|-------------|
| C | 1.779210955  | 2.778515981 | 0.000000000 |
| C | 3.211214910  | 2.778318236 | 0.000000000 |
| C | 3.927146847  | 4.018497572 | 0.000000000 |
| C | 3.211162889  | 5.258558873 | 0.000000000 |
| C | 1.779235557  | 5.258697197 | 0.000000000 |
| C | 1.063281838  | 4.018571332 | 0.000000000 |
| C | -0.325871955 | 4.018697640 | 0.000000000 |
| C | -1.553739611 | 4.018653612 | 0.000000000 |
| C | 1.084679998  | 6.461666109 | 0.000000000 |
| C | 0.470274924  | 7.524764816 | 0.000000000 |
| C | 3.905769487  | 6.461568236 | 0.000000000 |
| C | 4.519831677  | 7.524879654 | 0.000000000 |
| C | 5.316150348  | 4.018424785 | 0.000000000 |
| C | 6.544121261  | 4.018511802 | 0.000000000 |
| C | 3.905460254  | 1.575333527 | 0.000000000 |
| C | 4.519090018  | 0.511712010 | 0.000000000 |
| C | 1.084577268  | 1.575524979 | 0.000000000 |
| C | 0.470824048  | 0.511916325 | 0.000000000 |

### 2- GN membrane

|   |             |             |             |
|---|-------------|-------------|-------------|
| C | 2.611942491 | 0.680392950 | 0.000000000 |
| C | 4.086933972 | 0.680330378 | 0.000000000 |
| C | 4.769519750 | 1.862409672 | 0.000000000 |
| C | 4.031874608 | 3.139866051 | 0.000000000 |
| C | 2.667133010 | 3.139849546 | 0.000000000 |
| C | 1.929635713 | 1.862332381 | 0.000000000 |
| C | 6.038710262 | 2.595096550 | 0.000000000 |
| C | 7.403674794 | 2.595200855 | 0.000000000 |
| C | 8.141059425 | 3.872605493 | 0.000000000 |
| C | 7.458585029 | 5.054681557 | 0.000000000 |
| C | 5.983552339 | 5.054658192 | 0.000000000 |
| C | 5.301082123 | 3.872629515 | 0.000000000 |

### 3- RG membrane

|   |             |             |             |
|---|-------------|-------------|-------------|
| C | 0.180790330 | 2.711154795 | 0.000000000 |
| C | 0.180223352 | 4.160662266 | 0.000000000 |
| C | 1.378184558 | 2.009183867 | 0.000000000 |
| C | 1.377070468 | 4.864160540 | 0.000000000 |
| C | 2.426010165 | 1.376427352 | 0.000000000 |
| C | 2.424455055 | 5.497917784 | 0.000000000 |
| C | 3.622876006 | 0.673377701 | 0.000000000 |
| C | 3.622185343 | 6.199860981 | 0.000000000 |
| C | 4.820218252 | 1.375435136 | 0.000000000 |
| C | 5.868311778 | 2.007762184 | 0.000000000 |
| C | 4.819463192 | 5.497112613 | 0.000000000 |
| C | 5.867228860 | 4.863980587 | 0.000000000 |
